# Supplementary material
Source: publisher figshare collection journal article supplement (https://aacr.figshare.com/articles/dataset/_/22433298)

Supplementary Figure 10

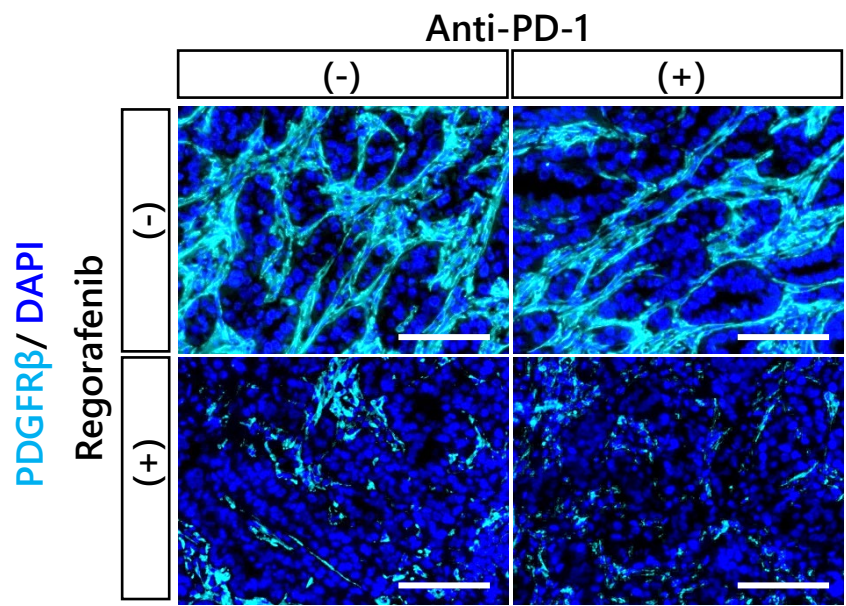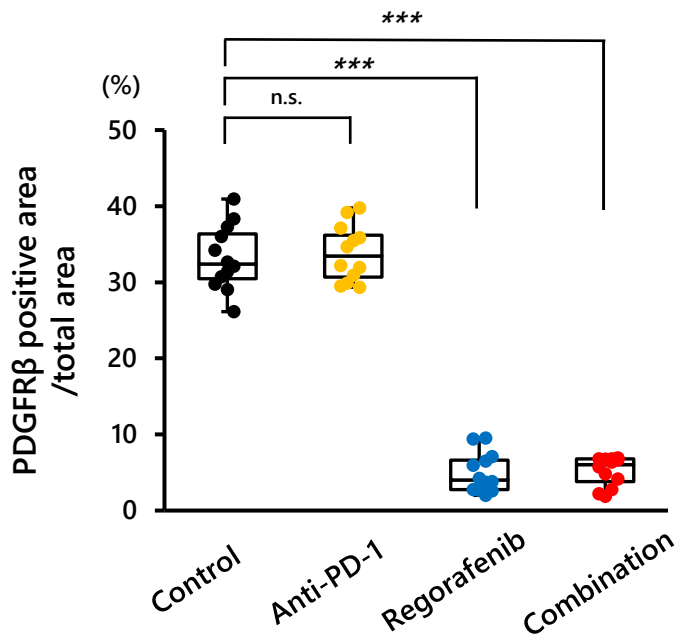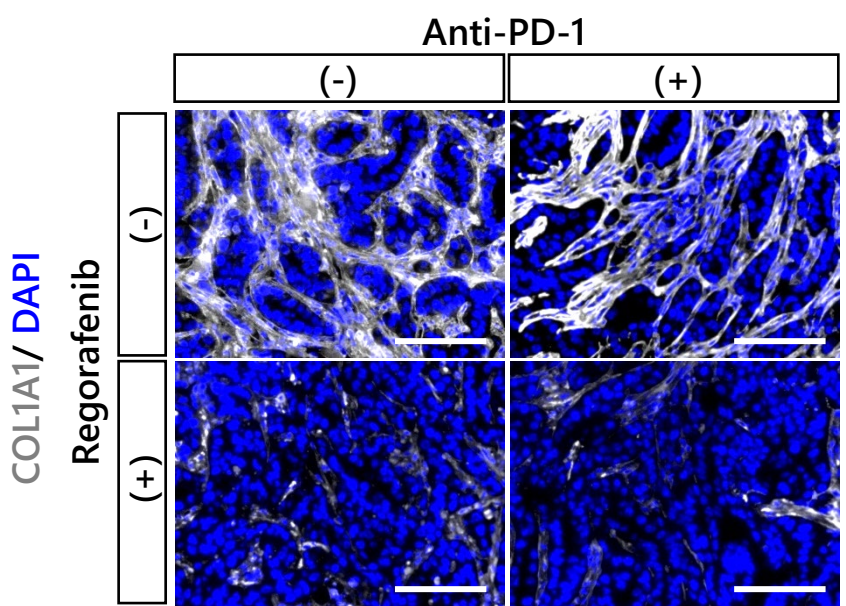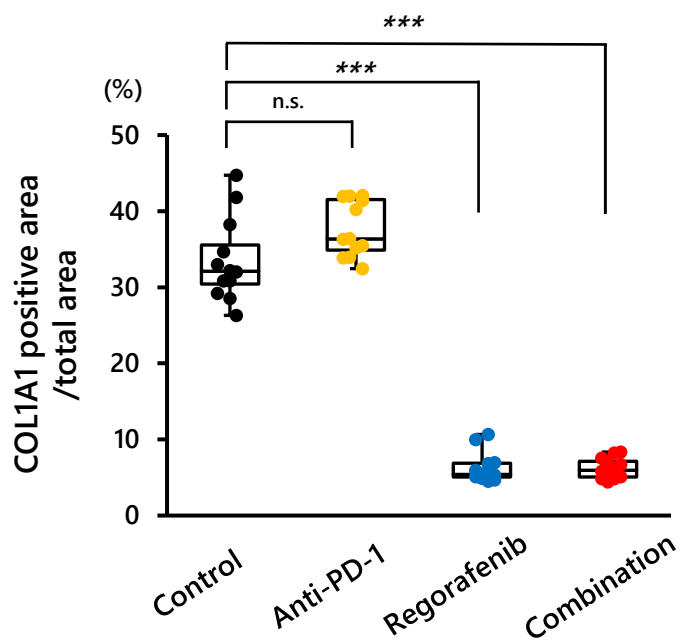

Supplement: Supplementary file 1 [file 39879735]
